# Supplementary material for: miR-378a-3p modulates tamoxifen sensitivity in breast cancer MCF-7 cells through targeting GOLT1A
Source: PubMed Central journal article supplement (PMC4530347; doi:10.1038/srep13170), 2015-08-10
Supplement: srep13170-s1.pdf [file srep13170-s1.pdf]

**miR-378a-3p modulates tamoxifen sensitivity in breast cancer MCF-7 cells through targeting *GOLT1A***

Kazuhiro Ikeda, Kuniko Horie-Inoue, Toshihide Ueno, Takashi Suzuki, Wataru Sato, Takashi Shigekawa, Akihiko Osaki, Toshiaki Saeki, Eugene Berezikov, Hiroyuki Mano, Satoshi Inoue

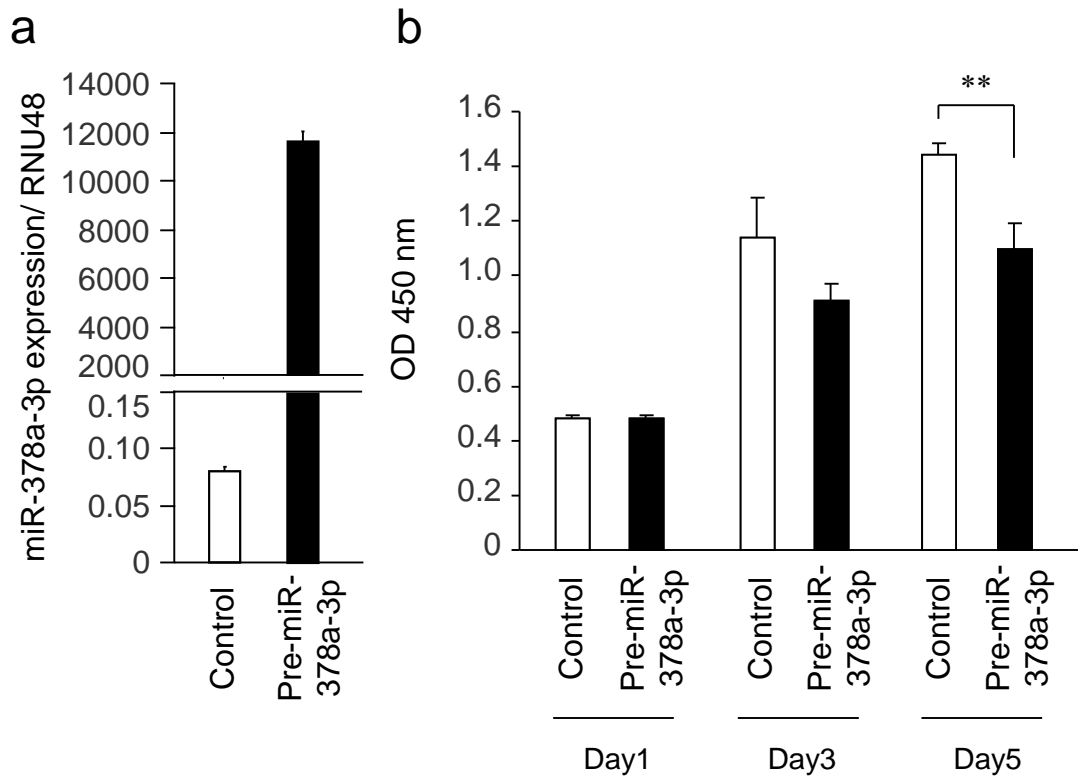

**Supplementary Figure S1.** miR-378a-3p reduced TamR cell growth. Cells were transfected with **pre**-miR-378a-3p or control, and treated with 1  $\mu$ M tamoxifen. Cell viability was analyzed by WST-8 cell proliferation assay at 1, 3, and 5 days after transfection. Data are presented as mean  $\pm$  s.d. (n = 3; \*\*,  $P < 0.01$ ).

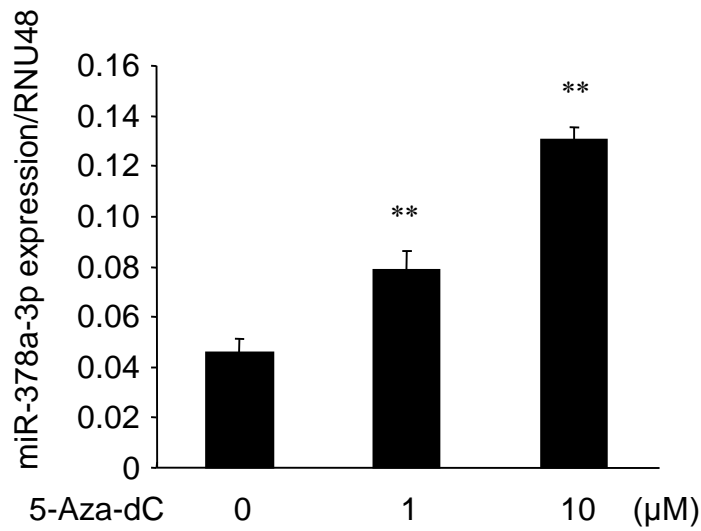

**Supplementary Figure S2.** DNA methyltransferase inhibitor 5-aza-2'-deoxycytidine upregulates miR-378a-3p expression in TamR cells. Cells were treated with 1 or 10 μM 5-aza-2'-deoxycytidine (5-Aza-dC) or vehicle for 72 h. miR378a-3p and RNU48 levels were analyzed by qPCR, performed in triplicate. miR-378a-3p expression was normalized to RNU48 and shown as mean  $\pm$  s.d. (n = 3; \*\*,  $P < 0.01$ ).

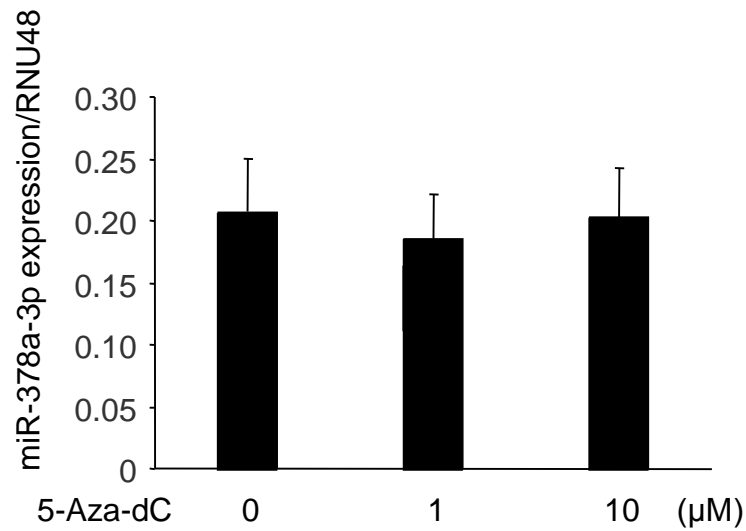

**Supplementary Figure S3.** miR-378a-3p expression is not influenced by treatment of 5-aza-2'-deoxycytidine in parental MCF-7 cells. Cells were treated with 1 or 10 μM 5-aza-2'-deoxycytidine (5-Aza-dC) or vehicle for 72 h. miR378a-3p and RNU48 levels were analyzed by qPCR, performed in triplicate. miR-378a-3p expression was normalized to RNU48 and shown as mean  $\pm$  s.d. (n = 3; \*\*,  $P < 0.01$ ).

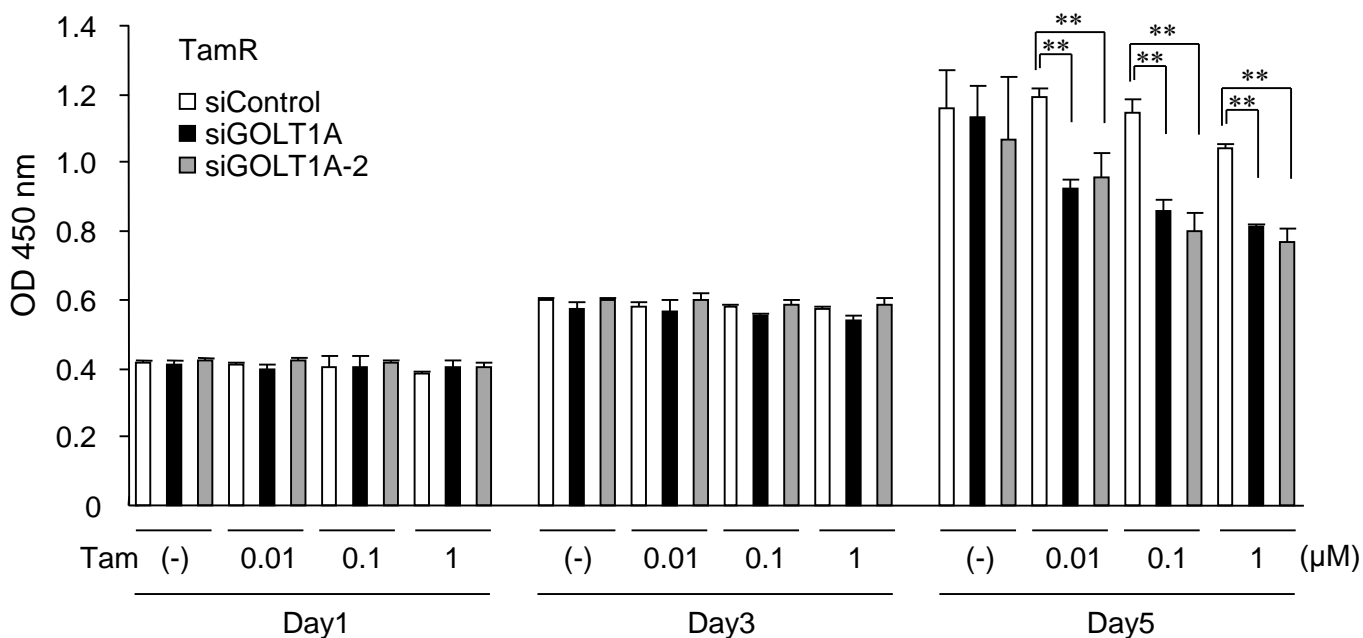

**Supplementary Figure S4.** GOLT1A knockdown reduced TamR cell growth dependent on the presence of tamoxifen. Cells were transfected with siGOLT1A, siGOLT1A-2 or negative control, and treated with 0.01, 0.1, or 1 μM tamoxifen (Tam) or vehicle (-). Cell viability was analyzed by WST-8 cell proliferation assay at 1, 3, and 5 days after transfection. Data are presented as mean  $\pm$  s.d. (n = 3; \*\*,  $P < 0.01$ ).

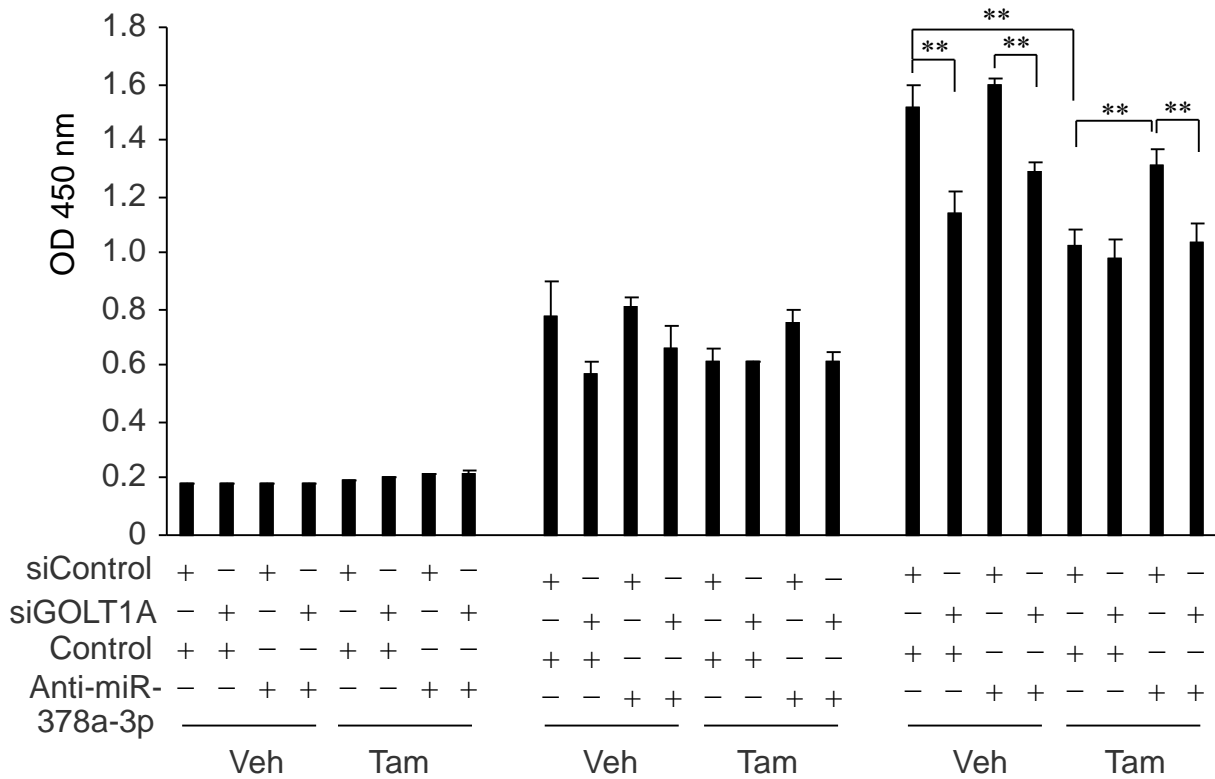

**Supplementary Figure S5.** Increased cell growth by miR-378a-3p knockdown is abrogated by GOLT1A silencing in TamR cells. Cells were transfected with the combinations of siGOLT1A or negative control siRNA (siControl) and anti-miR-378a-3p or anti-miR negative control (Control), and treated with or without 1  $\mu$ M tamoxifen. Cell viability was analyzed by WST-8 cell proliferation assay at 1, 3, and 5 days after transfection. Data are presented as mean  $\pm$  s.d. (n = 3; \*\*,  $P < 0.01$ ).

**Supplementary Table S1.** List of annotated miRNAs in MCF-7, TamR, and LTED cells.

| miR             | MCF-7 #1 (%) | MCF-7 #2 (%) | TamR (%) | LTED (%) | Fold change: TamR vs MCF-7s | Fold change: LTED vs MCF-7s |
|-----------------|--------------|--------------|----------|----------|-----------------------------|-----------------------------|
| hsa-mir-21-5p   | 61.4300      | 66.0780      | 78.9400  | 80.1174  | 1.2382                      | 1.1049                      |
| hsa-let-7f-5p   | 8.9411       | 7.2077       | 4.6630   | 5.8129   | 0.5775                      | 0.9794                      |
| hsa-let-7a-5p   | 4.9703       | 3.9738       | 2.2483   | 1.9738   | 0.5027                      | 0.6344                      |
| hsa-mir-378a-3p | 2.6922       | 2.2412       | 1.5110   | 0.8959   | 0.6126                      | 0.4776                      |
| hsa-mir-200c-3p | 3.0978       | 2.9198       | 1.0711   | 0.6561   | 0.3560                      | 0.3288                      |
| hsa-mir-30d-5p  | 1.1743       | 1.2033       | 0.9033   | 0.7976   | 0.7599                      | 0.7573                      |
| hsa-mir-182-5p  | 1.2368       | 1.0389       | 0.8370   | 0.4590   | 0.7356                      | 0.4894                      |
| hsa-mir-27b-3p  | 0.7151       | 0.8168       | 0.7877   | 0.4892   | 1.0284                      | 0.6098                      |
| hsa-mir-99b-5p  | 0.7329       | 0.8050       | 0.7696   | 0.2982   | 1.0009                      | 0.3787                      |
| hsa-mir-24-3p   | 1.3136       | 1.0908       | 0.6134   | 0.8550   | 0.5102                      | 1.0034                      |
| hsa-mir-101-3p  | 0.7769       | 0.8532       | 0.5119   | 0.2997   | 0.6281                      | 0.4390                      |
| hsa-mir-103a-3p | 0.8779       | 0.7412       | 0.4942   | 0.3901   | 0.6105                      | 0.6316                      |
| hsa-mir-26a-5p  | 0.4521       | 0.3619       | 0.3978   | 0.2717   | 0.9773                      | 0.7153                      |
| hsa-mir-93-5p   | 0.4990       | 0.5775       | 0.3680   | 0.2162   | 0.6838                      | 0.4572                      |
| hsa-mir-141-3p  | 0.7367       | 0.6522       | 0.3200   | 1.1778   | 0.4608                      | 2.4229                      |
| hsa-mir-148a-3p | 0.7137       | 0.6139       | 0.3152   | 0.0634   | 0.4749                      | 0.1364                      |
| hsa-mir-183-5p  | 0.5758       | 0.4921       | 0.2993   | 0.1804   | 0.5605                      | 0.4560                      |
| hsa-mir-27a-3p  | 0.2959       | 0.3357       | 0.2920   | 0.2332   | 0.9247                      | 0.7432                      |
| hsa-mir-374a-3p | 0.3757       | 0.4140       | 0.2586   | 0.1681   | 0.6549                      | 0.4999                      |
| hsa-mir-30e-5p  | 0.3049       | 0.2548       | 0.2569   | 0.5188   | 0.9180                      | 2.0277                      |
| hsa-mir-151a-3p | 0.3587       | 0.3320       | 0.2477   | 0.1941   | 0.7171                      | 0.6697                      |
| hsa-mir-200b-3p | 0.0988       | 0.0634       | 0.2113   | 0.1272   | 2.6045                      | 0.9260                      |
| hsa-mir-203-3p  | 0.2662       | 0.2596       | 0.1947   | 0.3034   | 0.7408                      | 1.3356                      |
| hsa-let-7d-5p   | 0.3774       | 0.3522       | 0.1766   | 0.0697   | 0.4841                      | 0.2635                      |
| hsa-mir-23b-3p  | 0.2310       | 0.1801       | 0.1615   | 0.0541   | 0.7855                      | 0.3169                      |
| hsa-mir-106b-5p | 0.2808       | 0.3480       | 0.1499   | 0.1547   | 0.4769                      | 0.6213                      |
| hsa-mir-425-5p  | 0.7521       | 0.6384       | 0.1441   | 0.1720   | 0.2073                      | 0.4395                      |
| hsa-mir-148b-3p | 0.3917       | 0.3103       | 0.1414   | 0.0479   | 0.4028                      | 0.2120                      |
| hsa-mir-200a-3p | 0.0569       | 0.0654       | 0.1355   | 0.0826   | 2.2169                      | 0.8222                      |
| hsa-let-7b-5p   | 0.2518       | 0.2076       | 0.1315   | 0.2827   | 0.5725                      | 1.6673                      |
| hsa-mir-140-3p  | 0.1365       | 0.1370       | 0.1221   | 0.0697   | 0.8932                      | 0.5383                      |

**Supplementary Table S1.** (continued)

| miR             | MCF-7 #1<br>(%) | MCF-7 #2<br>(%) | TamR<br>(%) | LTED<br>(%) | Fold change:<br>TamR vs<br>MCF-7s | Fold change:<br>LTED vs<br>MCF-7s |
|-----------------|-----------------|-----------------|-------------|-------------|-----------------------------------|-----------------------------------|
| hsa-mir-23a-3p  | 0.1211          | 0.1423          | 0.1133      | 0.0571      | 0.8605                            | 0.4464                            |
| hsa-mir-429-3p  | 0.0714          | 0.0474          | 0.1106      | 0.0927      | 1.8617                            | 1.1744                            |
| hsa-mir-181a-5p | 0.2786          | 0.2385          | 0.1078      | 0.1480      | 0.4171                            | 0.8548                            |
| hsa-let-7g-5p   | 0.1635          | 0.1395          | 0.1023      | 0.0821      | 0.6754                            | 0.6792                            |
| hsa-let-7e-5p   | 0.1274          | 0.1404          | 0.1015      | 0.2139      | 0.7583                            | 1.7688                            |
| hsa-mir-191-5p  | 0.4254          | 0.3319          | 0.0979      | 0.0906      | 0.2586                            | 0.4216                            |
| hsa-mir-32-5p   | 0.1415          | 0.0736          | 0.0946      | 0.0316      | 0.8801                            | 0.3755                            |
| hsa-mir-125a-5p | 0.1123          | 0.1218          | 0.0924      | 0.0535      | 0.7897                            | 0.4997                            |
| hsa-mir-363-3p  | 0.0554          | 0.0448          | 0.0677      | 0.0003      | 1.3498                            | 0.0056                            |
| hsa-mir-152-3p  | 0.0764          | 0.0647          | 0.0674      | 0.0236      | 0.9552                            | 0.3579                            |
| hsa-mir-22-3p   | 0.0352          | 0.0541          | 0.0666      | 0.0063      | 1.4908                            | 0.1036                            |
| hsa-mir-181b-5p | 0.1301          | 0.1404          | 0.0594      | 0.0827      | 0.4394                            | 0.8281                            |
| hsa-mir-1307-3p | 0.0874          | 0.1023          | 0.0528      | 0.0175      | 0.5567                            | 0.2261                            |
| hsa-mir-340-5p  | 0.1727          | 0.0722          | 0.0516      | 0.0418      | 0.4216                            | 0.6755                            |
| hsa-mir-26b-5p  | 0.0628          | 0.0706          | 0.0514      | 0.0981      | 0.7712                            | 1.6071                            |
| hsa-let-7i-5p   | 0.0803          | 0.0829          | 0.0501      | 0.0993      | 0.6136                            | 1.4938                            |
| hsa-mir-25-3p   | 0.0718          | 0.0617          | 0.0484      | 0.0484      | 0.7252                            | 0.8787                            |
| hsa-mir-146b-5p | 0.0412          | 0.0448          | 0.0468      | 0.0500      | 1.0869                            | 1.0917                            |
| hsa-mir-20a-5p  | 0.1564          | 0.1497          | 0.0462      | 0.0411      | 0.3020                            | 0.4193                            |
| hsa-mir-542-3p  | 0.0263          | 0.0321          | 0.0418      | 0.0581      | 1.4311                            | 1.5706                            |
| hsa-mir-126-3p  | 0.0974          | 0.0837          | 0.0407      | 0.0441      | 0.4496                            | 0.7089                            |
| hsa-mir-16-5p   | 0.0633          | 0.0271          | 0.0391      | 0.1882      | 0.8649                            | 5.6922                            |
| hsa-mir-21-3p   | 0.0270          | 0.0313          | 0.0374      | 0.0410      | 1.2834                            | 1.1928                            |
| hsa-mir-98-5p   | 0.0881          | 0.0795          | 0.0352      | 0.0393      | 0.4201                            | 0.6857                            |
| hsa-mir-744-5p  | 0.1429          | 0.1480          | 0.0341      | 0.0229      | 0.2345                            | 0.2514                            |
| hsa-mir-15a-5p  | 0.0697          | 0.0448          | 0.0336      | 0.0336      | 0.5863                            | 0.8579                            |
| hsa-mir-186-5p  | 0.1159          | 0.0829          | 0.0314      | 0.0208      | 0.3156                            | 0.3642                            |
| hsa-mir-30a-5p  | 0.4699          | 0.5623          | 0.0303      | 0.0423      | 0.0586                            | 0.1428                            |
| hsa-mir-96-5p   | 0.0419          | 0.0287          | 0.0292      | 0.0351      | 0.8250                            | 1.2135                            |
| hsa-mir-17-5p   | 0.1038          | 0.1074          | 0.0289      | 0.0284      | 0.2735                            | 0.4162                            |
| hsa-mir-30c-5p  | 0.0700          | 0.0516          | 0.0281      | 0.0220      | 0.4615                            | 0.5535                            |



**Supplementary Table S1.** (continued)

| miR             | MCF-7 #1 (%) | MCF-7 #2 (%) | TamR (%) | LTED (%) | Fold change: TamR vs MCF-7s | Fold change: LTED vs MCF-7s |
|-----------------|--------------|--------------|----------|----------|-----------------------------|-----------------------------|
| hsa-mir-1307-5p | 0.0462       | 0.0592       | 0.0270   | 0.0204   | 0.5115                      | 0.4735                      |
| hsa-mir-92a-3p  | 0.0668       | 0.0516       | 0.0264   | 0.0184   | 0.4461                      | 0.4713                      |
| hsa-mir-192-5p  | 0.0348       | 0.0372       | 0.0264   | 0.0213   | 0.7332                      | 0.6697                      |
| hsa-mir-423-3p  | 0.0540       | 0.0600       | 0.0264   | 0.0323   | 0.4630                      | 0.7481                      |
| hsa-mir-30e-3p  | 0.0426       | 0.0389       | 0.0259   | 0.0592   | 0.6342                      | 1.8271                      |
| hsa-mir-193b-3p | 0.0334       | 0.0194       | 0.0259   | 0.0117   | 0.9784                      | 0.5146                      |
| hsa-mir-769-5p  | 0.0345       | 0.0431       | 0.0220   | 0.0150   | 0.5672                      | 0.4616                      |
| hsa-mir-30b-5p  | 0.0172       | 0.0203       | 0.0209   | 0.0088   | 1.1140                      | 0.4256                      |
| hsa-mir-29b-3p  | 0.1159       | 0.0364       | 0.0204   | 0.1060   | 0.2674                      | 3.7364                      |
| hsa-mir-454-3p  | 0.0199       | 0.0127       | 0.0176   | 0.0152   | 1.0805                      | 1.0034                      |
| hsa-mir-29a-3p  | 0.0092       | 0.0127       | 0.0165   | 0.0201   | 1.5056                      | 1.3774                      |
| hsa-mir-301a-3p | 0.0171       | 0.0135       | 0.0160   | 0.0253   | 1.0431                      | 1.7191                      |
| hsa-mir-215-5p  | 0.0299       | 0.0330       | 0.0154   | 0.0003   | 0.4903                      | 0.0104                      |
| hsa-mir-9-5p    | 0.0142       | 0.0237       | 0.0149   | 0.0129   | 0.7840                      | 0.6712                      |
| hsa-mir-126-5p  | 0.0469       | 0.0321       | 0.0143   | 0.0071   | 0.3619                      | 0.3048                      |
| hsa-mir-27b-5p  | 0.0135       | 0.0152       | 0.0138   | 0.0221   | 0.9576                      | 1.5223                      |
| hsa-mir-374a-5p | 0.0242       | 0.0169       | 0.0132   | 0.0131   | 0.6428                      | 0.8714                      |
| hsa-mir-625-3p  | 0.0242       | 0.0262       | 0.0132   | 0.0008   | 0.5241                      | 0.0431                      |
| hsa-mir-151a-5p | 0.0185       | 0.0181       | 0.0129   | 0.0072   | 0.7027                      | 0.4625                      |
| hsa-mir-185-5p  | 0.0220       | 0.0220       | 0.0127   | 0.0556   | 0.5749                      | 3.2112                      |
| hsa-mir-141-5p  | 0.0231       | 0.0254       | 0.0118   | 0.0081   | 0.4881                      | 0.4374                      |
| hsa-mir-106b-3p | 0.0128       | 0.0194       | 0.0116   | 0.0086   | 0.7166                      | 0.5522                      |
| hsa-mir-320a-3p | 0.0262       | 0.0253       | 0.0105   | 0.0093   | 0.4083                      | 0.5199                      |
| hsa-mir-339-3p  | 0.0227       | 0.0279       | 0.0099   | 0.0542   | 0.3910                      | 2.8658                      |
| hsa-mir-15b-5p  | 0.0178       | 0.0237       | 0.0099   | 0.0245   | 0.4778                      | 1.4620                      |
| hsa-mir-374b-5p | 0.0178       | 0.0101       | 0.0094   | 0.0121   | 0.6700                      | 1.2460                      |
| hsa-mir-671-5p  | 0.0355       | 0.0313       | 0.0094   | 0.0040   | 0.2799                      | 0.1955                      |
| hsa-mir-331-3p  | 0.0135       | 0.0169       | 0.0077   | 0.0007   | 0.5064                      | 0.0608                      |
| hsa-mir-18a-5p  | 0.0213       | 0.0194       | 0.0066   | 0.0049   | 0.3238                      | 0.3784                      |
| hsa-let-7c-5p   | 0.1178       | 0.0934       | 0.0065   | 0.0962   | 0.0620                      | 1.9246                      |
| hsa-mir-181a-3p | 0.0142       | 0.0144       | 0.0061   | 0.0069   | 0.4233                      | 0.6729                      |
| hsa-mir-342-3p  | 0.1507       | 0.1319       | 0.0061   | 0.0108   | 0.0428                      | 0.1573                      |
